# Supplementary material
Source: publisher figshare collection journal article supplement (https://karger.figshare.com/ndownloader/files/26282032)
Supplement: Supplementary file 1 [file 26282032]

| **Table S2 Cox regression analysis for time to AVF dysfunction** | | |
| --- | --- | --- |
| **Variables** | **Crude HR (95% CI)** | ***P*** |
| Male | 1.26(0.81, 1.98) | 0.312 |
| Age | 1.00(1.00, 1.02) | 0.772 |
| Dialysis vintage | 0.96(0.91, 1.02) | 0.192 |
| Rope-ladder cannulation technique | 1.01(0.60, 1.69) | 0.976 |
| Chronic glomerulonephritis | Reference | |
| Hypertensive nephropathy | 0.96(0.56, 1.62) | 0.867 |
| Diabetic nephropathy | 1.23(0.75, 2.01) | 0.406 |
| Others | 1.29(0.78, 2.14) | 0.323 |
| Diabetes mellitus | 1.18（0.74, 1.89） | 0.480 |
| Cardiovascular disease | 1.57(0.98, 2.52) | 0.061 |
| CCI | 1.13(1.00, 1.28) | 0.057 |
| BMI | 1.00(0.94, 1.06) | 0.880 |
| Dialysis≥3 times per week | 3.852(1.22, 12.19) | 0.029 |
| |Pa| | 1.02(1.01, 1.03) | 0.001 |
| Qb | 1.00(0.99,1.00) | 0.409 |
| |Pa/Qb|*10 | 1.71(1.29, 2.25) | <0.001 |
| AVF vintage | 1.00(1.00,1.00) | 0.289 |
| Previous VAs | 1.32(1.02, 1.72) | 0.037 |
| Elbow/upper arm | 0.92(0.23, 3.75) | 0.911 |
| AVF, arteriovenous fistula; HR, hazard ratio; CI, confidence interval; CCI, Charlson Comorbidity Index; BMI, body mass index; |Pa|, absolute value of the prepump arterial pressure; Qb, extracorporeal blood pump flow; |Pa/Qb|, the absolute value of the Pa to extracorporeal blood pump flow ratio; Previous VAs, the number of vascular access which had been established before, arteriovenous fistula, arteriovenous graft and catheters; | | |
